# Supplementary material for: RIP5 Interacts with REL1 and Negatively Regulates Drought Tolerance in Rice
Source: MDPI journal article supplement (doi:10.3390/cells13110887), 2024-05-21
Supplement: s1 [file s1]

Supplementary Materials:

**Oryza sativa Japonica Group DNA, chromosome 6, cultivar: Nipponbare, complete sequence**

Sequence ID: [AP014962.1](#) Length: 31248787 Number of Matches: 2

Range 1: 21954299 to 21954934 [GenBank](#) [Graphics](#)

[▼ Next Match](#) [▲ Previous Match](#)

| Score          | Expect | Identities    | Gaps      | Strand    |
|----------------|--------|---------------|-----------|-----------|
| 1175 bits(636) | 0.0    | 636/636(100%) | 0/636(0%) | Plus/Plus |

Features: [os06g0567900](#)  
[os06g0567950](#)

|       |          |                                                              |          |
|-------|----------|--------------------------------------------------------------|----------|
| Query | 1        | GGGCGCTACAGGTGGTCCATCAACAACGTGTCCCTGACGCTGCCGGCGACGCCGTACCTG | 60       |
| Sbjct | 21954299 | GGGCGCTACAGGTGGTCCATCAACAACGTGTCCCTGACGCTGCCGGCGACGCCGTACCTG | 21954358 |
| Query | 61       | GGGCGCTTCCACACGGGCTCCAGGACAGGCGCTTCGACGCTCCGGCGAGCCGGCGGCG   | 120      |
| Sbjct | 21954359 | GGGCGCTTCCACACGGGCTCCAGGACAGGCGCTTCGACGCTCCGGCGAGCCGGCGGCG   | 21954418 |
| Query | 121      | GCGTTCCCGGAGGACTACGACGTGATGAGGCCGCCGGCGAACAACGCGACGACGGCGAGC | 180      |
| Sbjct | 21954419 | GCGTTCCCGGAGGACTACGACGTGATGAGGCCGCCGGCGAACAACGCGACGACGGCGAGC | 21954478 |
| Query | 181      | GACAGGGTGTTCGGCTGGGACACGGGCGGCGTGGTGGACGTGGTCTCCAGAACGCCAAC  | 240      |
| Sbjct | 21954479 | GACAGGGTGTTCGGCTGGGACACGGGCGGCGTGGTGGACGTGGTCTCCAGAACGCCAAC  | 21954538 |
| Query | 241      | ATGCTGAGGGAGGAGGTGAGCGAGACGCCACCCGTGGCACTCCACGGCCACGACTTCTGG | 300      |
| Sbjct | 21954539 | ATGCTGAGGGAGGAGGTGAGCGAGACGCCACCCGTGGCACTCCACGGCCACGACTTCTGG | 21954598 |
| Query | 301      | GTGCTCGGCTACGGGACGGCGGTACGACCCGGCGGCGACGCGCGGGGCTCAACGCC     | 360      |
| Sbjct | 21954599 | GTGCTCGGCTACGGGACGGCGGTACGACCCGGCGGCGACGCGCGGGGCTCAACGCC     | 21954658 |
| Query | 361      | GCCGACCCGCGCTGCCGGAACACGGCGGTGGTCTTCCCGCACGGGTGGACGGGCTTCGG  | 420      |
| Sbjct | 21954659 | GCCGACCCGCGCTGCCGGAACACGGCGGTGGTCTTCCCGCACGGGTGGACGGGCTTCGG  | 21954718 |
| Query | 421      | TTGCTCGCCAAACAACCGGCGGTGGGCGTTCCACTGCCACATCGAGCCGCACTCCAC    | 480      |
| Sbjct | 21954719 | TTGCTCGCCAAACAACCGGCGGTGGGCGTTCCACTGCCACATCGAGCCGCACTCCAC    | 21954778 |
| Query | 481      | ATGGGCATGGGGCTGCTCTTCTGTCGAGGGGAGGACAGGATGCACGAGCTCGAGCTGCC  | 540      |
| Sbjct | 21954779 | ATGGGCATGGGGCTGCTCTTCTGTCGAGGGGAGGACAGGATGCACGAGCTCGAGCTGCC  | 21954838 |
| Query | 541      | AAGGACGCCATGGCGTCCGGCTCGTCCGACGACGGCGCCACGCCGCTCAACCCGGCA    | 600      |
| Sbjct | 21954839 | AAGGACGCCATGGCGTCCGGCTCGTCCGACGACGGCGCCACGCCGCTCAACCCGGCA    | 21954898 |
| Query | 601      | ACGCCGCTGCTCCGTCGCCGCGCGCGGCCATGA                            | 636      |
| Sbjct | 21954899 | ACGCCGCTGCTCCGTCGCCGCGCGCGGCCATGA                            | 21954934 |

**Figure S1.** Sequence alignment of the *REL1* interacting protein 5 (*RIP5*) obtained from the Y2H screening experiment with the genome of Nipponbare.

Identity = 100 % (636 / 636). Gap = 66.56 % (1266 / 1902)

**Figure S2.** Sequence alignment of *OsAAO2* and *RIP5\_partial\_region* obtained from the Y2H screening experiment.

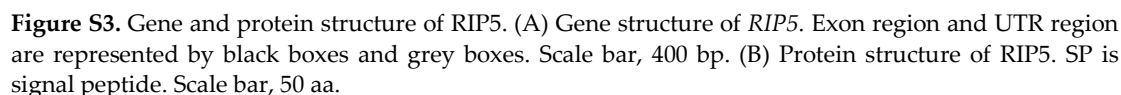



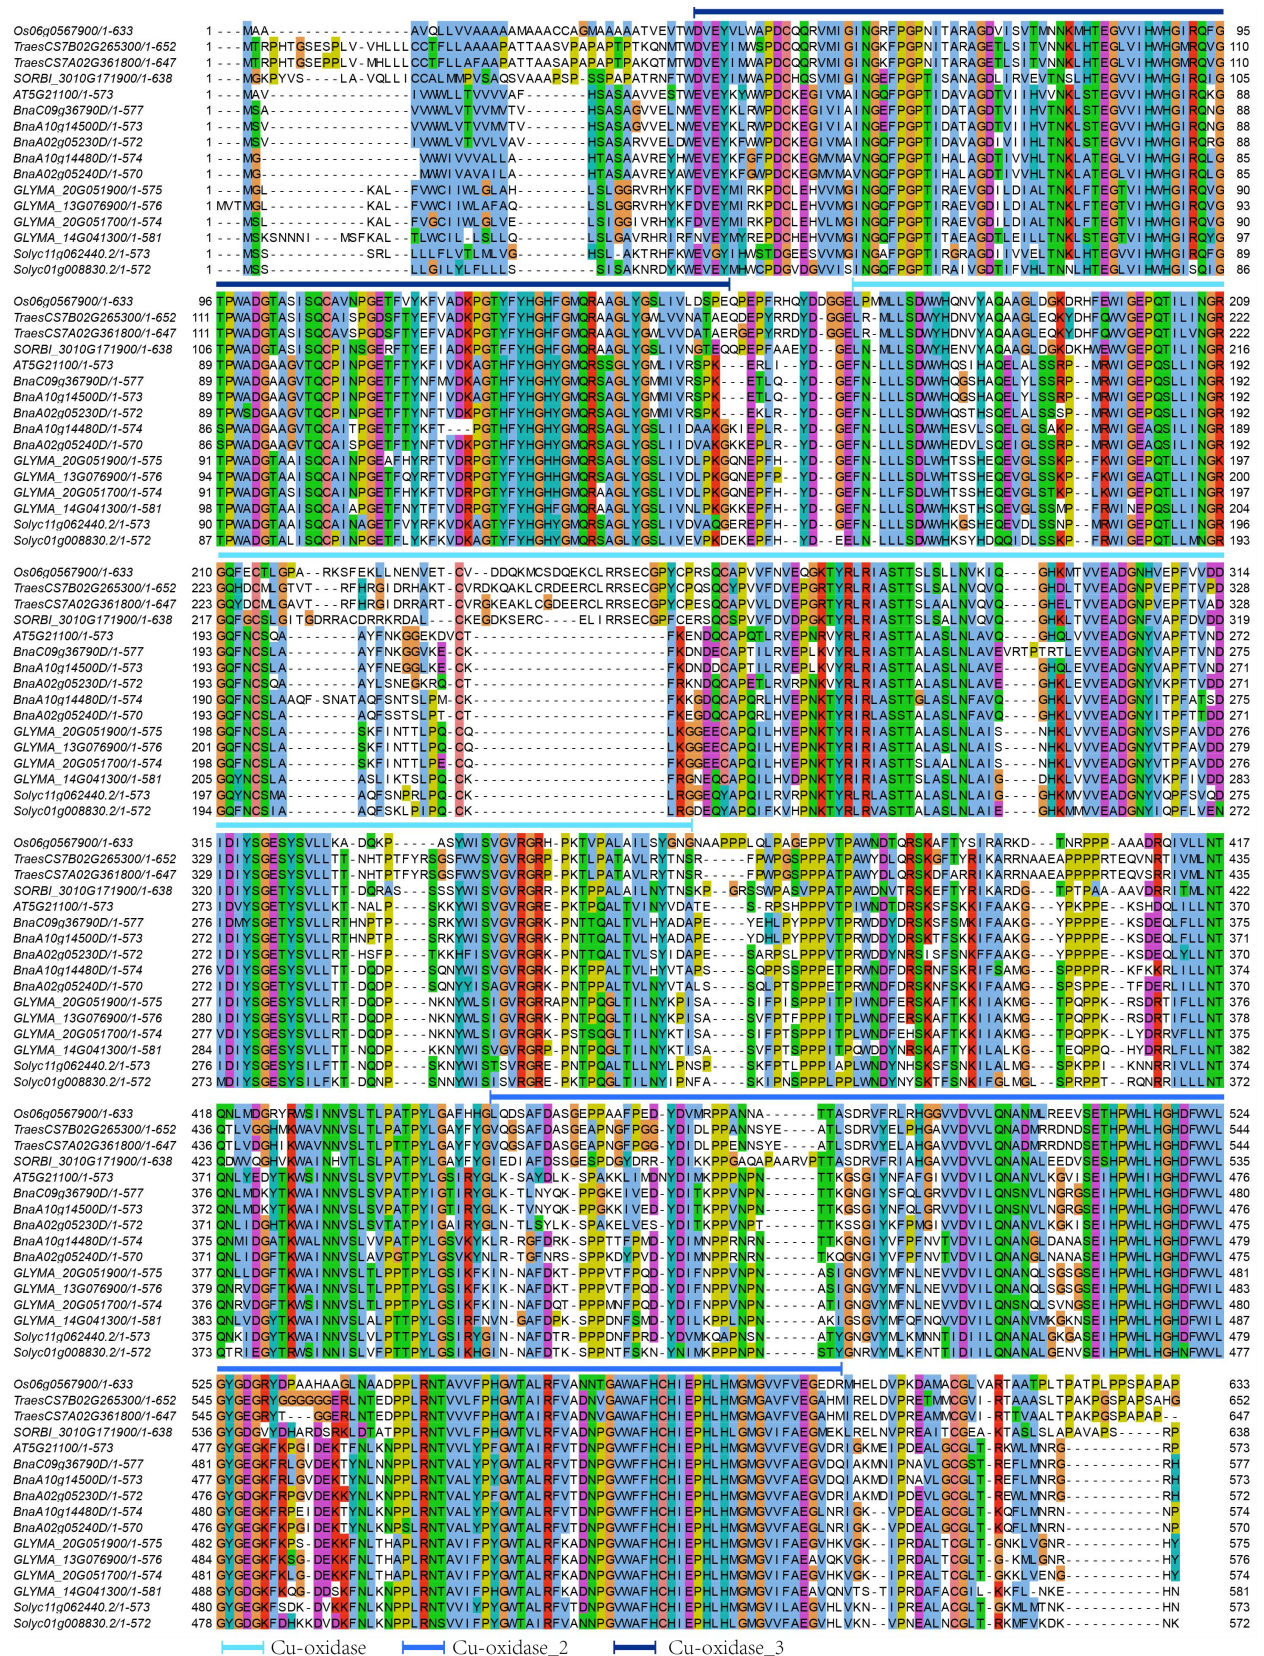

**Figure S4.** Multiple sequence alignment of the homologous genes of *RIP5* in arabidopsis, soybean, sorghum, maize, wheat, rape and tomato.

**Table S1.** List of primers used in this study.

| Application          | Primer          | Sequence (5'-3')                            |
|----------------------|-----------------|---------------------------------------------|
| plasmid construction | AD-RIP5-F       | GCCATGGAGGCCAGTGAATTCATGGCGG<br>CCGCCGTGCAG |
| plasmid construction | AD-RIP5-R       | CAGCTCGAGCTCGATGGATCCTCATGGCG<br>CCGGCGCCGG |
| plasmid construction | RIP5-pSPYCE-F   | TATCCAGATCCAGTGGGATCCATGGCGG<br>CCGCCGTGCAG |
| plasmid construction | RIP5-pSPYCE-R   | CGCACTAGTAAGCTTGGTACCTGGCGCCG<br>GCGCCGGCGA |
| plasmid construction | RIP5-pRTVnGFP-F | GAGGACTTGAATGAAGGATCCATGGCGG<br>CCGCCGTGCAG |
| plasmid construction | RIP5-pRTVnGFP-R | CGCACTAGTAAGCTTGGTACCTCATGGCG<br>CCGGCGCCGG |
| plasmid construction | RIP5-pC-F       | AACGATACTCGAGGGGGATCCATGGCGG<br>CCGCCGTGCAG |
| plasmid construction | RIP5-pC-R       | GGGAAATTCGCTAGTGGATCCTCATGGCG<br>CCGGCGCCGG |
| Genotype analysis    | V-Cas9-F        | AGCCCTGCCTTCATACGCTA                        |
| Genotype analysis    | V-Cas9-R        | CTGCTGGGACTCCGTGGATA                        |
| Genotype analysis    | P1              | GTGATGATCGGGATAAACGGC                       |
| Genotype analysis    | P2              | GTTTCATGGTGACGCTGATCACG                     |
| Genotype analysis    | P3              | CGTGACACACACCACTCACT                        |
| Genotype analysis    | P4              | TGTGTCCCATCCACCCAAAA                        |
| Genotype analysis    | RIP5OE-F        | AGGACCTCGACCTCAACACAAC                      |
| Genotype analysis    | RIP5OE-R        | ACGACGAGCAGCTGCACG                          |
| Genotype analysis    | rel1-39208      | ATTAATCGGCAATAGGTCTC                        |
| Genotype analysis    | TDNA7777        | TCGTGGA AAAAAGAAGACGTTCT                    |
| Genotype analysis    | rel1-72833      | CGAGATAATGCAGGAGTACAA                       |
| qRT-PCR              | actin-F         | TCCAGCAGATGTGGATTGCCAAGG                    |
| qRT-PCR              | actin-R         | TCTGGTACCCTCATCAGGCATCTG                    |
| qRT-PCR              | qRIP5-F         | CCCATTCCAGTTAAATGCCATT                      |
| qRT-PCR              | qRIP5-R         | AAACCACTCTTCATCAGTGAGT                      |
| qRT-PCR              | OsMYB2-F        | GGGCTGAAACGCACAGGCAAGA                      |
| qRT-PCR              | OsMYB2-R        | CTGCTTGGCGTGCTTCTGC                         |
| qRT-PCR              | POX22.3-F       | CAGCTGCTCCAAGGTGAAGTC                       |
| qRT-PCR              | POX22.3-R       | AGATTGCTTCCAGCAACGAA                        |
| qRT-PCR              | OsbHLH148-F     | AGCTACGCCGACCTCTACG                         |

| Application | Primer      | Sequence (5'-3')          |
|-------------|-------------|---------------------------|
| qRT-PCR     | OsbHLH148-R | GGAAGCTATTATTTGTATGATTGTA |
| qRT-PCR     | OsDT11-F    | TGTGTGACGCCGTGCAAT        |
| qRT-PCR     | OsDT11-R    | CCAGGGCCGGAAGCTAGA        |
| qRT-PCR     | OsWRKY76-F  | TTCCGAATGCTTTTCTGCTG      |
| qRT-PCR     | OsWRKY76-R  | ATCGTGAGGCCCGATAGAAG      |
| qRT-PCR     | OsLEA3-F    | CGGCAGCGTCCTCCAAC         |
| qRT-PCR     | OsLEA3-R    | CGGTCATCCCCAGCGTG         |

**Table S2.** Physical and chemical parameters of genes in the *OsAAOs* family

| Uniport_entry name          | Gene ID      | Name   | Protein length (aa) | Molecular weight / kDa | Protein isoelectric point (pI) | Instability index   | GRAVY  | Subcellular localization |
|-----------------------------|--------------|--------|---------------------|------------------------|--------------------------------|---------------------|--------|--------------------------|
| A0A0P0WY31_Q5<br>Z645_ORYSJ | Os01g0816700 | OsAAO1 | 553                 | 61.66                  | 8.83                           | 32.30<br>(stable)   | -0.203 | Extracellular            |
| A0A0P0WYB7_Q5<br>Z5T3_ORYSJ | Os06g0567200 | OsAAO2 | 581                 | 62.98                  | 7.34                           | 35.05<br>(stable)   | -0.075 | Chloroplast              |
| Q7XIF0_ORYSJ                | Os06g0567900 | OsAAO3 | 633                 | 69.12                  | 5.90                           | 43.86<br>(unstable) | -0.231 | Extracellular            |
| A0A0P0XMD7_B8<br>BEW5_ORYSJ | Os07g0119400 | OsAAO4 | 545                 | 59.07                  | 7.17                           | 41.87<br>(unstable) | -0.150 | Chloroplast              |
| A0A8J8XW93_Q0J<br>0J1_ORYSJ | Os09g0365900 | OsAAO5 | 577                 | 62.87                  | 7.38                           | 35.04<br>(stable)   | -0.156 | Chloroplast              |
| A0A0P0V9P6_Q94<br>2J6_ORYSJ | Os09g0507300 | OsAAO6 | 574                 | 62.05                  | 6.98                           | 37.50<br>(stable)   | -0.117 | Cell wall                |

**Table S3.** List of sample sequencing data quality summary in this study.

| Sample        | Raw_reads | Clean_reads | Clean_bases | Error_rate | Q20   | Q30   | GC_pct |
|---------------|-----------|-------------|-------------|------------|-------|-------|--------|
| rip5-ko_PEG_1 | 39322474  | 38392556    | 5.76 G      | 0.02       | 98.22 | 94.82 | 51.98  |
| rip5-ko_PEG_2 | 48078672  | 46927924    | 7.04 G      | 0.02       | 98.22 | 94.85 | 52.96  |
| rip5-ko_PEG_3 | 40686302  | 39714814    | 5.96 G      | 0.02       | 98.25 | 94.86 | 52.61  |
| ZH11_PEG_1    | 49920428  | 49295096    | 7.39 G      | 0.03       | 97.6  | 93.29 | 51.7   |
| ZH11_PEG_2    | 45815086  | 45267186    | 6.79 G      | 0.03       | 97.69 | 93.5  | 52.48  |
| ZH11_PEG_3    | 47386120  | 46730102    | 7.01 G      | 0.03       | 97.68 | 93.44 | 52.65  |
